# Supplementary figures and images for: PLZF is a negative regulator of retinoic acid receptor transcriptional activity
Source: Springer Nature journal article supplement (doi:10.1186/1478-1336-1-6), 2003-09-06

A)

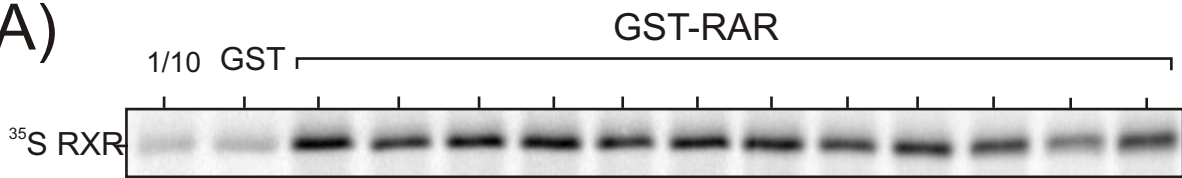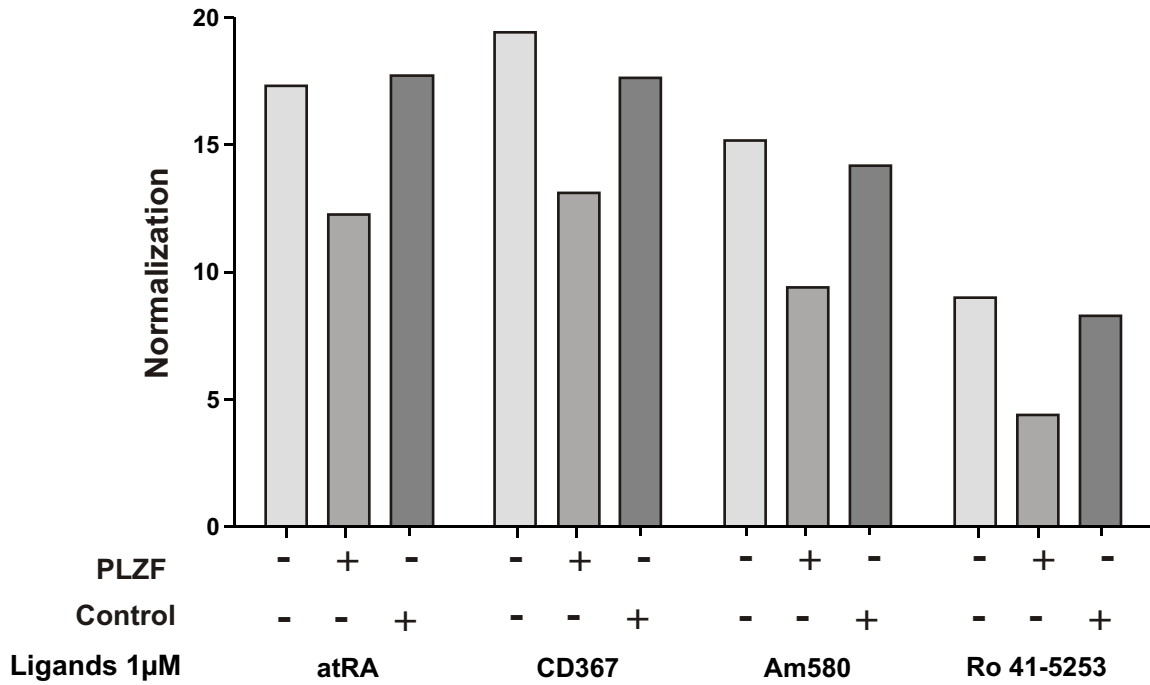

B)

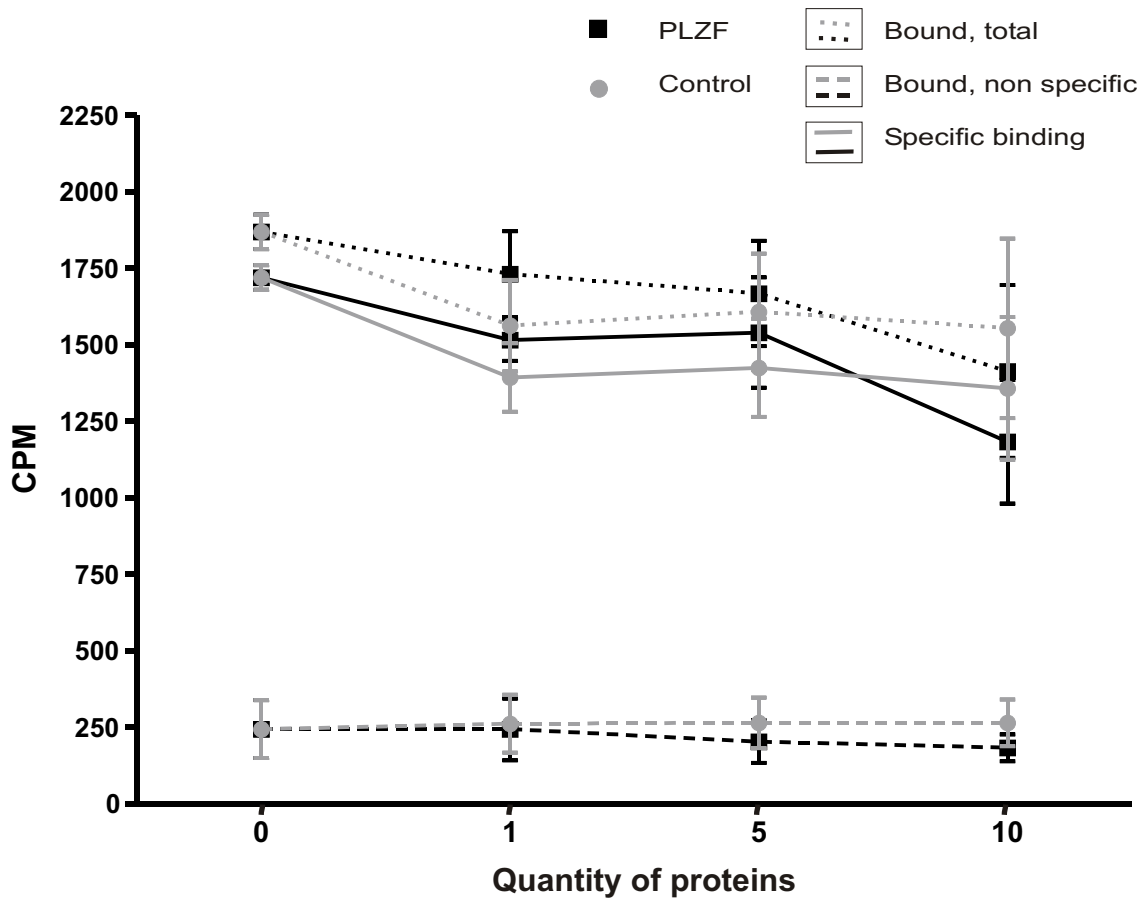

Supplement: Additional file 1 [file 1478-1336-1-6-s1.pdf]
